# Supplementary material
Source: Springer Nature journal article supplement (https://www.springermedizin.de/resource/supplementary/12865_2009_325_MOESM12_ESM.pdf/9427762)
Supplement: MOESM12 [file 9427762]

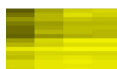

Type I interferon signaling; Negative regulation of cell cycle; Anti-viral activity

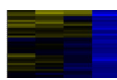

Immune Response; Inflammatory Regulators; Cytokines (*TNF*)

**Early**

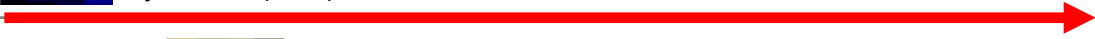

**Early-Mid**

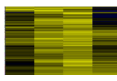

NF- $\kappa$ B signaling; transcriptional pathways; inflammatory response; cell motility and migration

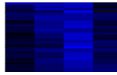

Transcriptional Regulation

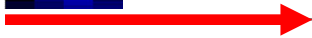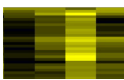

Immune Response; Phosphotransferases and kinases

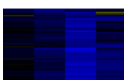

Protein making machinery; Ribosomal Processing; Maturation; Assembly

**Mid**

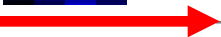

Antigen Processing; Type I interferon response; Induction of apoptosis

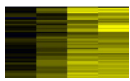

Hallmark immune response genes; MHC class I

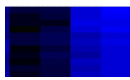

Translation; Metabolic processes

**Mid-Late**

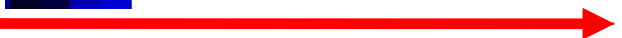

Immune Response; Inflammatory Regulators; Cytokines (*TNF*)

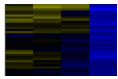

Apoptosis; Cell motility and migration; Phospho-relay genes

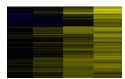

Transcription; RNA processing; Pro-survival genes

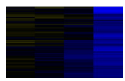

**Late**

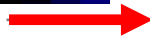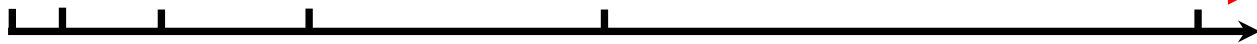

0 1hr 3hr 6hr 12hr 24hr
